# Supplementary material
Source: Springer Nature journal article supplement (https://www.springermedizin.de/resource/supplementary/12937_2010_310_MOESM3_ESM.pdf/25654842)
Supplement: MOESM3 [file 25654842]

**Table 3. Immunomodulatory Polysaccharide-Rich Plant Powders: Oral Animal Studies**

| Source                                                  | Animal                                                                     | Oral dose/day                                           | Duration  | Treatment                                                                                                                     | Significant effects                                                                                                                                     | Reference |
|---------------------------------------------------------|----------------------------------------------------------------------------|---------------------------------------------------------|-----------|-------------------------------------------------------------------------------------------------------------------------------|---------------------------------------------------------------------------------------------------------------------------------------------------------|-----------|
| <i>Agaricus (A. blazei) subrufescens</i> (fruit bodies) | 6-week ♂ C57BL/6, C3H/HeJ and BALB/c mice (3/group)                        | 16, 32 or 64 mg                                         | 2 weeks   | Healthy animals                                                                                                               | 32 and 64 mg ↑ liver mononuclear cell cytotoxicity                                                                                                      | [25]      |
| <i>Grifola frondosa</i>                                 | 6-week ♀ ICR mice (10-15/group)                                            | 5% of diet                                              | 36 weeks  | Oral N-butyl-N'-butanolnitrosamine daily for first 8 weeks                                                                    | ↓ #s of animals with bladder tumors; ↓ tumor weight; ↑ peritoneal Mφ chemotactic activity, splenic lymphocyte blastogenic response & cytotoxic activity | [70]      |
| <i>Laminaria angustata</i>                              | Weanling SD rats (58/group)                                                | 5% of diet                                              | 26 weeks  | IG DMBA, beginning of week 5                                                                                                  | ↑ time to tumor development and ↓ # of adenocarcinomas in adenocarcinoma-bearing animals                                                                | [77]      |
| <i>Lentinula (Lentinus) edodes</i>                      | 6-week ♀ ICR mice (10-17/group)                                            | 5% of diet                                              | 36 weeks  | Oral BBN daily for first 8 weeks                                                                                              | ↓ # of animals with bladder tumors; ↓ tumor weight; ↑ Mφ chemotactic activity, splenic lymphocyte blastogenic response, cytotoxic activity              | [70]      |
|                                                         | 7-8-week ♂ Swiss mice (10/group)                                           | 1%, 5% or 10% of diet of 4 different lineages days 1-15 | 16 days   | Injected IP N-ethyl-N-nitrosourea day 15                                                                                      | All 3 doses of one lineage and the 5% dose of two other lineages ↓ #s of micronucleated bone marrow polychromatic erythrocytes                          | [79]      |
| <i>Lentinula edodes</i> (fruit bodies)                  | 5-week ♀ ICR mice (14/group x 2)                                           | 10%, 20% or 30% of diet                                 | 25 days   | Injected IP Sarcoma-180 ascites                                                                                               | All 3 doses ↓ Sarcoma-180 tumor weight                                                                                                                  | [78]      |
|                                                         | Mice: 1) CDF <sub>1</sub> ; 2) C3H; 3) BALB/c; 4,5) C57BL/6N (9/group x 3) | 20% of diet                                             | 25 days   | Injected SC: 1) IMC carcinoma, 2) MM-46 carcinoma, 3) Meth-A fibrosarcoma, 4) B-16 melanoma, or 5) Lewis lung carcinoma cells | ↓ growth of MM-46, B-16, Lewis lung, and IMC tumors; ↑ lifespan in Lewis lung and MM-46 animals                                                         |           |
|                                                         | ICR mice (14/group x 2)                                                    | 20% of diet days 1-7, days 7-31 or days 14-31           | 31 days   | Injected IP Sarcoma-180 ascites                                                                                               | ↓ tumor weight & growth when fed days 7-31 or 14-31                                                                                                     |           |
|                                                         | Mice: 1) CDF <sub>1</sub> ; 2) C3H (5/group x 4)                           | 20% of diet                                             | 7-12 days | Injected SC: 1) IMC carcinoma or 2) MM-46 carcinoma cells                                                                     | ↑ spreading rate of activated Mφ ↑ phagocytic activity                                                                                                  |           |
| <i>Phellinus linteus</i>                                | 4-week ♂ ICR mice (10/group)                                               | 2 mg                                                    | 1 month   | Healthy animals                                                                                                               | ↓ serum & splenocyte IgE production; ↑ proportion of splenic CD4 <sup>+</sup> T cells & splenocyte IFN-γ production                                     | [31]      |

---

|                            |                                    |            |          |                                     |                                                                                                                                                             |      |
|----------------------------|------------------------------------|------------|----------|-------------------------------------|-------------------------------------------------------------------------------------------------------------------------------------------------------------|------|
| <i>Pleurotus ostreatus</i> | 6-week ♀ ICR mice<br>(10-20/group) | 5% of diet | 36 weeks | Oral BBN daily for first<br>8 weeks | ↓ #s of animals with bladder tumors; ↓ tumor<br>weight; ↑ plasma Mφ chemotactic activity,<br>splenic lymphocyte blastogenic response,<br>cytotoxic activity | [70] |
|----------------------------|------------------------------------|------------|----------|-------------------------------------|-------------------------------------------------------------------------------------------------------------------------------------------------------------|------|

---
